# Supplementary material for: Antibiotic resistance characteristics and risk factors analysis of Helicobacter pylori strains isolated from patients in Liaoning Province, an area in North China
Source: PeerJ. 2023 May 16;11:e15268. doi: 10.7717/peerj.15268 (PMC10198150; doi:10.7717/peerj.15268)
Supplement: Data S1 — Antibiotic resistance rates and population characteristics, such as age, gender, current smoking status, current drinking conditions, BMI, hypertension, diabetes mellitus, endoscopic diagnosis and H. pylori treatment history. [file peerj-11-15268-s001.xlsx]

## Sheet: statistic code
subjects	age (years)	age code ≥50=1; ＜50=0	gender male=1; female=2	current smoking yes=1; no=0	current drinking yes=1; no=0	BMI ≥25=1; ＜25=0	hypertension yes=1; no=0	Diabetes yes=1; no=0	Endoscopic diagnosis, Superficial gastritis=1; Atrophic gastritis=2; Peptic ulcer diseases=3; MALToma=4; Gastric cancer=5	History of H.pylori treatment, yes=1; no=0	MIC to AOZ	AOZ resistance=1; sensitive=0	MIC to TC	TC resistance=1; sensitive=0	MIC to LFX	LFX resistance=1; sensitive=0	MIC to MET	MET resistance=1; sensitive=0	MIC to CLA	CLA resistance=1; sensitive=0	MIC to AMX	AMX resistance=1; sensitive=0
s1	53	1	2	0	0	0	0	0	2	1	≤0.5	0	≤0.5	0	8	1	32	1	4	1	0.5	1
s2	59	1	1	0	0	0	1	1	4	1	≤0.5	0	≤0.5	0	1	0	32	1	≤0.25	0	≤0.03	0
s3	55	1	2	0	0	1	0	0	1	1	≤0.5	0	≤0.5	0	8	1	32	1	4	1	≤0.03	0
s4	57	1	1	0	1	0	0	0	2	1	≤0.5	0	≤0.5	0	8	1	>32	1	4	1	≤0.03	0
s5	54	1	1	0	0	1	0	0	2	1	≤0.5	0	1	0	＞8	1	>32	1	4	1	0.12	0
s6	74	1	2	0	0	0	1	1	5	1	≤0.5	0	≤0.5	0	≤0.5	0	32	1	≤0.25	0	≤0.03	0
s7	35	0	2	0	1	1	0	0	1	0	≤0.5	0	≤0.5	0	1	0	32	1	4	1	≤0.03	0
s8	45	0	2	0	0	0	0	0	1	1	≤0.5	0	≤0.5	0	1	0	>32	1	4	1	0.12	0
s9	53	1	2	0	0	0	1	0	4	1	≤0.5	0	≤0.5	0	1	0	32	1	0.5	0	0.12	0
s10	64	1	2	0	0	0	1	0	2	0	≤0.5	0	≤0.5	0	8	1	32	1	0.5	0	≤0.03	0
s11	64	1	2	0	0	0	1	0	1	1	≤0.5	0	≤0.5	0	1	0	32	1	0.5	0	0.12	0
s12	68	1	2	0	0	0	0	0	2	1	1	0	1	0	1	0	>32	1	＞4	1	0.5	1
s13	45	0	2	0	0	0	0	0	2	0	≤0.5	0	≤0.5	0	8	1	8	0	≤0.25	0	≤0.03	0
s14	49	0	1	1	1	0	0	1	3	1	≤0.5	0	≤0.5	0	8	1	32	1	4	1	0.5	1
s15	54	1	1	0	0	1	0	0	2	1	≤0.5	0	≤0.5	0	8	1	32	1	4	1	≤0.03	0
s16	66	1	1	1	1	1	1	0	2	1	≤0.5	0	≤0.5	0	1	0	32	1	0.5	0	≤0.03	0
s17	53	1	1	1	0	0	0	0	3	1	≤0.5	0	1	0	≤0.5	0	32	1	4	1	0.12	0
s18	64	1	1	0	1	0	1	1	2	1	≤0.5	0	≤0.5	0	8	1	32	1	4	1	0.5	1
s19	43	0	1	0	1	1	1	0	1	1	≤0.5	0	≤0.5	0	≤0.5	0	32	1	≤0.25	0	≤0.03	0
s20	51	1	1	1	1	1	0	0	2	1	≤0.5	0	≤0.5	0	1	0	>32	1	4	1	0.5	1
s21	48	0	2	0	0	0	0	0	1	1	≤0.5	0	1	0	8	1	8	0	4	1	0.12	0
s22	64	1	1	0	0	0	1	1	2	1	≤0.5	0	≤0.5	0	8	1	32	1	4	1	≤0.03	0
s23	53	1	1	0	0	0	1	0	2	0	≤0.5	0	≤0.5	0	8	1	>32	1	4	1	≤0.12	0
s24	56	1	2	0	0	1	0	0	2	0	≤0.5	0	≤0.5	0	1	0	32	1	0.5	0	≤0.03	0
s25	40	0	2	0	0	0	0	0	2	0	≤0.5	0	≤0.5	0	1	0	32	1	4	1	≤0.03	0
s26	51	1	2	0	0	0	0	0	2	1	≤0.5	0	≤0.5	0	＞8	1	≤2	0	＞4	1	≤0.03	0
s27	50	1	2	0	0	0	1	0	2	1	1	0	1	0	8	1	32	1	4	1	0.12	0
s28	55	1	2	0	0	0	0	0	2	1	≤0.5	0	≤0.5	0	≤0.5	0	32	1	＞4	1	≤0.03	0
s29	33	0	1	0	0	0	0	0	1	0	≤0.5	0	≤0.5	0	8	1	32	1	0.5	0	≤0.03	0
s30	59	1	2	0	0	0	0	1	2	1	1	0	≤0.5	0	8	1	32	1	＞4	1	≤0.03	0
s31	64	1	2	0	0	0	0	0	2	1	≤0.5	0	≤0.5	0	8	1	32	1	4	1	0.5	1
s32	55	1	2	0	0	0	0	0	2	1	≤0.5	0	≤0.5	0	8	1	32	1	4	1	≤0.03	0
s33	37	0	1	0	0	0	0	0	2	1	≤0.5	0	≤0.5	0	＞8	1	32	1	＞4	1	≤0.03	0
s34	60	1	2	1	1	0	0	1	2	1	≤0.5	0	≤0.5	0	8	1	32	1	4	1	0.12	0
s35	55	1	2	0	0	0	0	0	2	1	≤0.5	0	≤0.5	0	8	1	32	1	＞4	1	0.5	1
s36	58	1	2	0	0	0	0	0	1	1	≤0.5	0	≤0.5	0	≤0.5	0	32	1	≤0.25	0	≤0.03	0
s37	38	0	1	0	0	1	0	0	1	1	≤0.5	0	≤0.5	0	8	1	8	0	＞4	1	≤0.03	0
s38	23	0	2	0	0	0	0	0	2	1	≤0.5	0	≤0.5	0	8	1	32	1	4	1	0.5	1
s39	46	0	2	0	1	1	0	0	1	1	≤0.5	0	≤0.5	0	8	1	32	1	0.5	0	≤0.03	0
s40	57	1	2	0	0	1	1	0	2	1	≤0.5	0	≤0.5	0	1	0	32	1	4	1	0.12	0
s41	67	1	2	0	0	0	0	0	2	1	≤0.5	0	≤0.5	0	1	0	32	1	4	1	≤0.03	0
s42	59	1	2	0	0	0	0	0	2	1	≤0.5	0	1	0	≤0.5	0	32	1	4	1	0.12	0
s43	60	1	1	0	0	1	0	1	2	1	≤0.5	0	≤0.5	0	1	0	32	1	0.5	0	0.12	0
s44	61	1	2	0	0	0	0	0	2	1	≤0.5	0	≤0.5	0	≤0.5	0	32	1	4	1	≤0.03	0
s45	45	0	2	0	0	0	0	0	1	1	≤0.5	0	1	0	＞8	1	8	0	4	1	≤0.03	0
s46	55	1	2	0	0	1	1	1	2	1	≤0.5	0	≤0.5	0	1	0	8	0	0.5	0	≤0.03	0
s47	42	0	2	0	0	0	0	0	1	1	≤0.5	0	≤0.5	0	1	0	32	1	4	1	≤0.03	0
s48	66	1	2	0	0	0	0	0	2	1	≤0.5	0	≤0.5	0	8	1	32	1	4	1	≤0.03	0
s49	42	0	2	0	0	0	0	0	4	1	≤0.5	0	≤0.5	0	≤0.5	0	32	1	0.5	0	≤0.03	0
s50	63	1	1	0	0	0	0	0	2	1	≤0.5	0	≤0.5	0	8	1	32	1	＞4	1	≤0.03	0
s51	45	0	2	0	0	0	0	1	2	1	≤0.5	0	≤0.5	0	8	1	32	1	＞4	1	0.5	1
s52	58	1	2	0	0	0	1	1	5	1	≤0.5	0	≤0.5	0	1	0	32	1	0.5	0	≤0.03	0
s53	57	1	2	0	0	0	0	1	2	0	≤0.5	0	≤0.5	0	1	0	32	1	4	1	≤0.03	0
s54	58	1	2	0	0	0	0	0	2	1	≤0.5	0	≤0.5	0	1	0	32	1	4	1	≤0.03	0
s55	41	0	2	0	0	0	0	0	1	1	≤0.5	0	≤0.5	0	8	1	32	1	4	1	0.5	1
s56	72	1	2	0	0	0	1	1	2	1	≤0.5	0	≤0.5	0	＞8	1	8	0	0.5	0	≤0.03	0
s57	60	1	2	0	0	0	0	1	2	1	≤0.5	0	≤0.5	0	8	1	32	1	＞4	1	≤0.03	0
s58	45	0	2	1	1	0	1	0	1	0	≤0.5	0	≤0.5	0	1	0	8	0	＞4	1	≤0.03	0
s59	68	1	2	0	0	0	1	0	2	1	≤0.5	0	≤0.5	0	1	0	32	1	4	1	≤0.03	0
s60	62	1	2	0	0	0	0	0	1	1	≤0.5	0	≤0.5	0	1	0	32	1	4	1	0.5	1
s61	57	1	1	0	0	0	0	0	1	1	≤0.5	0	1	0	8	1	32	1	4	1	0.5	1
s62	51	1	2	0	0	0	0	1	2	1	≤0.5	0	≤0.5	0	1	0	32	1	4	1	≤0.03	0
s63	65	1	2	0	0	1	1	0	1	1	≤0.5	0	≤0.5	0	8	1	32	1	4	1	0.5	1
s64	40	0	2	1	0	0	0	0	2	1	≤0.03	0	≤0.5	0	≤0.5	0	8	0	0.25	0	≤0.5	0
s65	55	1	1	0	0	0	0	0	2	1	≤0.5	0	≤0.5	0	1	0	8	0	0.5	0	≤0.03	0
s66	62	1	2	0	0	0	0	0	2	1	≤0.5	0	≤0.5	0	8	1	32	1	4	1	0.5	1
s67	39	0	2	0	1	1	0	0	1	1	≤0.5	0	≤0.5	0	8	1	8	0	＞4	1	≤0.03	0
s68	49	0	2	0	0	1	0	0	2	1	≤0.5	0	≤0.5	0	1	0	32	1	4	1	≤0.03	0
s69	41	0	1	0	1	0	0	0	1	1	≤0.5	0	≤0.5	0	8	1	32	1	4	1	0.5	1
s70	51	1	1	0	0	1	0	0	2	1	≤0.5	0	≤0.5	0	1	0	32	1	4	1	0.5	1
s71	57	1	2	0	0	1	0	0	3	1	≤0.5	0	≤0.5	0	1	0	8	0	0.5	0	≤0.03	0
s72	64	1	1	0	0	1	1	0	2	1	≤0.5	0	≤0.5	0	1	0	32	1	≤0.25	0	≤0.03	0
s73	47	0	2	0	0	0	0	0	2	0	≤0.5	0	≤0.5	0	≤0.5	0	8	0	≤0.25	0	≤0.03	0
s74	31	0	2	0	0	0	0	0	1	1	≤0.5	0	≤0.5	0	1	0	32	1	0.5	0	0.12	0
s75	44	0	2	0	0	0	0	0	1	1	≤0.5	0	≤0.5	0	8	1	32	1	4	1	0.5	1
s76	33	0	2	0	0	0	0	0	1	1	≤0.5	0	≤0.5	0	8	1	8	0	4	1	0.12	0
s77	59	1	2	0	0	0	0	0	2	1	≤0.5	0	≤0.5	0	≤0.5	0	8	0	≤0.25	0	0.12	0
s78	50	1	2	0	0	0	0	0	1	1	≤0.5	0	≤0.5	0	≤0.5	0	32	1	4	1	≤0.03	0
s79	40	0	2	1	1	1	0	0	2	1	≤0.5	0	≤0.5	0	≤0.5	0	32	1	4	1	0.5	1
s80	35	0	1	0	1	0	0	0	1	1	≤0.5	0	≤0.5	0	1	0	8	0	≤0.25	0	≤0.03	0
s81	35	0	2	0	1	0	0	0	1	0	≤0.5	0	1	0	＞8	1	32	1	＞4	1	0.5	1
s82	57	1	1	0	0	1	0	0	2	1	≤0.5	0	≤0.5	0	1	0	8	0	4	1	0.12	0
s83	28	0	2	0	0	0	0	0	1	1	≤0.5	0	≤0.5	0	≤0.5	0	32	1	4	1	0.12	0
s84	62	1	2	0	0	1	0	0	2	1	≤0.5	0	≤0.5	0	1	0	32	1	4	1	0.5	1
s85	53	1	2	0	0	0	0	0	1	1	≤0.5	0	≤0.5	0	1	0	>32	1	＞4	1	≤0.03	0
s86	52	1	2	0	0	1	0	0	1	1	≤0.5	0	≤0.5	0	1	0	32	1	＞4	1	>0.5	0
s87	52	1	2	0	1	0	0	0	1	0	≤0.5	0	≤0.5	0	8	1	32	1	4	1	0.12	0
s88	49	0	2	0	1	0	0	0	1	1	≤0.5	0	≤0.5	0	8	1	32	1	4	1	0.12	0
s89	58	1	1	1	0	0	0	1	3	1	≤0.5	0	≤0.5	0	1	0	8	0	4	1	0.5	1
s90	34	0	2	0	0	0	0	0	1	1	≤0.5	0	≤0.5	0	≤0.5	0	≤2	0	≤0.25	0	≤0.03	0
s91	29	0	2	0	0	0	0	0	1	1	≤0.5	0	≤0.5	0	≤0.5	0	32	1	4	1	≤0.03	0
s92	35	0	1	0	0	1	0	0	2	1	≤0.5	0	≤0.5	0	≤0.5	0	32	1	0.5	0	≤0.03	0
s93	66	1	1	0	0	0	0	1	5	1	≤0.5	0	≤0.5	0	1	0	32	1	≤0.25	0	≤0.03	0
s94	58	1	2	0	0	0	1	0	2	1	≤0.5	0	≤0.5	0	1	0	32	1	4	1	≤0.03	0
s95	67	1	2	0	0	0	1	1	2	1	≤0.5	0	≤0.5	0	8	1	32	1	4	1	0.12	0
s96	58	1	2	0	0	0	1	0	1	0	≤0.5	0	≤0.5	0	8	1	8	0	4	1	≤0.03	0
s97	47	0	2	0	0	1	0	0	2	1	≤0.5	0	≤0.5	0	8	1	32	1	＞4	1	0.5	1
s98	62	1	2	0	0	0	1	0	2	1	1	0	1	0	8	1	32	1	＞4	1	0.12	0
s99	50	1	2	0	0	0	0	0	2	1	≤0.5	0	≤0.5	0	1	0	≤2	0	4	1	≤0.03	0
s100	23	0	1	0	0	0	0	0	1	1	≤0.5	0	≤0.5	0	8	1	8	0	＞4	1	0.5	1
s101	52	1	2	0	1	0	1	0	2	1	≤0.5	0	≤0.5	0	1	0	8	0	＞4	1	0.5	1
s102	61	1	2	0	0	0	0	1	2	1	≤0.5	0	≤0.5	0	≤0.5	0	32	1	0.5	0	≤0.03	0
s103	63	1	2	0	0	0	0	0	2	0	≤0.5	0	≤0.5	0	1	0	8	0	＞4	1	0.5	1
s104	62	1	1	0	0	1	0	0	1	0	≤0.5	0	≤0.5	0	8	1	32	1	4	1	≤0.03	0
s105	46	0	2	0	0	1	0	0	1	1	≤0.5	0	≤0.5	0	≤0.5	0	32	1	4	1	0.5	1
s106	57	1	2	0	0	0	0	0	2	1	≤0.5	0	≤0.5	0	8	1	32	1	4	1	0.12	0
s107	41	0	2	0	0	0	0	0	1	1	≤0.5	0	≤0.5	0	8	1	8	0	＞4	1	≤0.03	0
s108	33	0	2	0	0	0	0	0	1	1	≤0.5	0	≤0.5	0	＞8	1	32	1	＞4	1	≤0.03	0
s109	35	0	1	0	0	0	0	0	1	1	≤0.5	0	≤0.5	0	≤0.5	0	32	1	≤0.25	0	≤0.03	0
s110	52	1	2	0	0	0	0	0	2	1	≤0.5	0	≤0.5	0	＞8	1	32	1	＞4	1	≤0.03	0
s111	68	1	1	0	0	0	0	0	2	1	≤0.5	0	≤0.5	0	＞8	1	32	1	＞4	1	0.5	1
s112	56	1	1	0	0	0	0	0	1	1	≤0.5	0	≤0.5	0	≤0.5	0	32	1	0.5	0	≤0.03	0
s113	61	1	2	0	0	0	1	0	2	1	≤0.5	0	≤0.5	0	8	1	32	1	4	1	0.12	0
s114	46	0	2	0	0	0	0	0	2	1	≤0.5	0	≤0.5	0	≤0.5	0	32	1	0.5	0	≤0.03	0
s115	38	0	2	0	0	0	0	0	1	0	≤0.5	0	≤0.5	0	1	0	32	1	＞4	1	0.5	1
s116	71	1	2	0	0	0	1	0	2	1	≤0.5	0	≤0.5	0	≤0.5	0	32	1	＞4	1	0.5	1
s117	61	1	1	0	0	0	0	0	2	1	≤0.5	0	≤0.5	0	≤0.5	0	32	1	≤0.25	0	≤0.03	0
s118	38	0	1	0	1	0	0	0	1	0	≤0.5	0	≤0.5	0	≤0.5	0	8	0	4	1	≤0.03	0
s119	48	0	1	0	1	1	0	0	2	1	≤0.5	0	≤0.5	0	1	0	8	0	4	1	≤0.03	0
s120	58	1	2	0	0	1	0	0	2	1	≤0.5	0	≤0.5	0	≤0.5	0	8	0	＞4	1	≤0.03	0
s121	68	1	2	0	0	0	0	1	1	1	≤0.5	0	≤0.5	0	1	0	32	1	≤0.25	0	≤0.03	0
s122	53	1	1	1	0	1	0	0	2	1	≤0.5	0	≤0.5	0	≤0.5	0	32	1	≤0.25	0	≤0.03	0
s123	39	0	2	0	0	0	0	0	1	1	≤0.5	0	≤0.5	0	1	0	32	1	0.5	0	0.12	0
s124	62	1	2	0	0	1	0	0	1	1	≤0.5	0	≤0.5	0	＞8	1	>32	1	＞4	1	≤0.03	0
s125	66	1	1	0	0	1	0	0	2	1	≤0.5	0	1	0	＞8	1	>32	1	＞4	1	≤0.03	0
s126	37	0	1	0	0	0	0	0	1	1	≤0.5	0	≤0.5	0	1	0	8	0	4	1	0.5	1
s127	53	1	2	0	0	0	0	0	2	1	≤0.5	0	≤0.5	0	8	1	32	1	4	1	≤0.03	0
s128	40	0	2	0	0	1	0	0	1	1	≤0.5	0	≤0.5	0	8	1	32	1	4	1	0.12	0
s129	41	0	2	0	0	0	0	0	1	1	≤0.5	0	≤0.5	0	≤0.5	0	8	0	＞4	1	0.5	1
s130	58	1	2	0	0	0	0	0	1	1	≤0.5	0	≤0.5	0	≤0.5	0	32	1	≤0.25	0	≤0.03	0
s131	27	0	2	0	0	0	0	0	1	1	≤0.5	0	≤0.5	0	≤0.5	0	>32	1	4	1	≤0.03	0
s132	50	1	1	0	0	1	0	0	2	1	≤0.5	0	≤0.5	0	≤0.5	0	32	1	0.5	0	0.12	0
s133	49	0	2	0	0	0	0	0	2	1	≤0.5	0	≤0.5	0	8	1	8	0	＞4	1	≤0.03	0
s134	58	1	2	0	0	0	0	1	2	1	≤0.5	0	≤0.5	0	≤0.5	0	32	1	4	1	0.12	0
s135	70	1	2	0	0	0	0	0	1	1	≤0.5	0	≤0.5	0	1	0	32	1	≤0.25	0	0.12	0
s136	66	1	1	0	0	0	1	0	1	1	≤0.5	0	≤0.5	0	≤0.5	0	32	1	≤0.25	0	≤0.03	0
s137	53	1	2	0	0	0	0	0	2	1	≤0.5	0	≤0.5	0	≤0.5	0	32	1	≤0.25	0	0.12	0
s138	54	1	2	0	0	0	0	0	2	1	≤0.5	0	≤0.5	0	8	1	32	1	4	1	0.12	0
s139	37	0	2	0	0	1	0	0	1	1	≤0.5	0	≤0.5	0	1	0	8	0	4	1	≤0.03	0
s140	80	1	2	0	0	0	0	0	2	1	≤0.5	0	≤0.5	0	1	0	32	1	4	1	≤0.03	0
s141	67	1	2	0	0	1	1	0	5	1	≤0.5	0	≤0.5	0	≤0.5	0	32	1	4	1	0.12	0
s142	51	1	2	0	0	1	1	1	1	1	≤0.5	0	≤0.5	0	≤0.5	0	32	1	0.5	0	≤0.03	0
s143	56	1	2	0	0	0	1	0	2	1	≤0.5	0	≤0.5	0	8	1	32	1	4	1	0.5	1
s144	54	1	1	1	0	0	0	0	1	1	≤0.5	0	≤0.5	0	≤0.5	0	32	1	4	1	0.5	1
s145	64	1	2	0	0	0	0	0	2	1	≤0.5	0	≤0.5	0	8	1	32	1	4	1	0.5	1
s146	70	1	1	0	1	1	0	0	2	1	≤0.5	0	≤0.5	0	8	1	32	1	4	1	≤0.03	0
s147	43	0	1	0	1	0	0	0	1	1	≤0.5	0	≤0.5	0	8	1	32	1	4	1	≤0.03	0
s148	44	0	1	0	1	0	0	0	2	1	≤0.5	0	≤0.5	0	1	0	>32	1	＞4	1	≤0.12	0
s149	62	1	1	0	0	0	0	0	2	1	≤0.5	0	≤0.5	0	8	1	>32	1	4	1	0.5	1
s150	67	1	1	0	1	1	1	0	2	1	≤0.5	0	≤0.5	0	8	1	32	1	4	1	0.5	1
s151	45	0	1	0	1	0	0	1	2	1	≤0.5	0	≤0.5	0	1	0	32	1	4	1	≤0.03	0
s152	62	1	2	0	1	0	1	0	1	1	≤0.5	0	≤0.5	0	1	0	32	1	4	1	≤0.03	0
s153	47	0	2	0	0	0	1	0	1	1	≤0.5	0	≤0.5	0	1	0	32	1	0.5	0	≤0.03	0
s154	59	1	1	0	0	0	0	0	1	1	≤0.5	0	≤0.5	0	1	0	32	1	≤0.25	0	≤0.03	0
s155	58	1	2	0	0	1	0	0	2	1	≤0.5	0	≤0.5	0	1	0	32	1	0.5	0	0.12	0
s156	72	1	2	0	0	0	1	0	1	1	≤0.5	0	≤0.5	0	1	0	32	1	＞4	1	≤0.03	0
s157	57	1	1	1	1	1	0	0	2	1	≤0.5	0	≤0.5	0	≤0.5	0	32	1	4	1	≤0.03	0
s158	42	0	1	0	0	1	0	0	2	1	≤0.5	0	≤0.5	0	＞8	1	8	0	＞4	1	≤0.03	0
s159	55	1	2	0	0	0	0	0	1	1	≤0.5	0	≤0.5	0	≤0.5	0	32	1	＞4	1	0.12	0
s160	41	0	1	0	0	0	0	0	1	1	≤0.5	0	≤0.5	0	1	0	8	0	＞4	1	≤0.03	0
s161	58	1	1	1	1	0	0	0	1	1	≤0.5	0	≤0.5	0	1	0	32	1	0.5	0	0.12	0
s162	58	1	2	0	0	0	0	0	1	1	≤0.5	0	≤0.5	0	1	0	32	1	＞4	1	≤0.03	0
s163	57	1	2	0	0	0	0	1	2	1	≤0.5	0	≤0.5	0	＞8	1	32	1	4	1	≤0.03	0

## Sheet: information code
subjects	age code ≥50=1; ＜50=0	gender male=1; female=2	current smoking yes=1; no=0	current drinking yes=1; no=0	BMI ≥25=1; ＜25=0	hypertension yes=1; no=0	Diabetes yes=1; no=0	Endoscopic diagnosis, Superficial gastritis=1; Atrophic gastritis=2; Peptic ulcer diseases=3; MALToma=4; Gastric cancer=5	History of H.pylori treatment, yes=1; no=0	LEV resistance=1; sensitive=0	MTZ resistance=1; sensitive=0	CLR resistance=1; sensitive=0	AML resistance=1; sensitive=0
s1	1	2	0	0	0	0	0	2	1	1	1	1	1
s2	1	1	0	0	0	1	1	4	1	0	1	0	0
s3	1	2	0	0	1	0	0	1	1	1	1	1	0
s4	1	1	0	1	0	0	0	2	1	1	1	1	0
s5	1	1	0	0	1	0	0	2	1	1	1	1	0
s6	1	2	0	0	0	1	1	5	1	0	1	0	0
s7	0	2	0	1	1	0	0	1	0	0	1	1	0
s8	0	2	0	0	0	0	0	1	1	0	1	1	0
s9	1	2	0	0	0	1	0	4	1	0	1	0	0
s10	1	2	0	0	0	1	0	2	0	1	1	0	0
s11	1	2	0	0	0	1	0	1	1	0	1	0	0
s12	1	2	0	0	0	0	0	2	1	0	1	1	1
s13	0	2	0	0	0	0	0	2	0	1	0	0	0
s14	0	1	1	1	0	0	1	3	1	1	1	1	1
s15	1	1	0	0	1	0	0	2	1	1	1	1	0
s16	1	1	1	1	1	1	0	2	1	0	1	0	0
s17	1	1	1	0	0	0	0	3	1	0	1	1	0
s18	1	1	0	1	0	1	1	2	1	1	1	1	1
s19	0	1	0	1	1	1	0	1	1	0	1	0	0
s20	1	1	1	1	1	0	0	2	1	0	1	1	1
s21	0	2	0	0	0	0	0	1	1	1	0	1	0
s22	1	1	0	0	0	1	1	2	1	1	1	1	0
s23	1	1	0	0	0	1	0	2	0	1	1	1	0
s24	1	2	0	0	1	0	0	2	0	0	1	0	0
s25	0	2	0	0	0	0	0	2	0	0	1	1	0
s26	1	2	0	0	0	0	0	2	1	1	0	1	0
s27	1	2	0	0	0	1	0	2	1	1	1	1	0
s28	1	2	0	0	0	0	0	2	1	0	1	1	0
s29	0	1	0	0	0	0	0	1	0	1	1	0	0
s30	1	2	0	0	0	0	1	2	1	1	1	1	0
s31	1	2	0	0	0	0	0	2	1	1	1	1	1
s32	1	2	0	0	0	0	0	2	1	1	1	1	0
s33	0	1	0	0	0	0	0	2	1	1	1	1	0
s34	1	2	1	1	0	0	1	2	1	1	1	1	0
s35	1	2	0	0	0	0	0	2	1	1	1	1	1
s36	1	2	0	0	0	0	0	1	1	0	1	0	0
s37	0	1	0	0	1	0	0	1	1	1	0	1	0
s38	0	2	0	0	0	0	0	2	1	1	1	1	1
s39	0	2	0	1	1	0	0	1	1	1	1	0	0
s40	1	2	0	0	1	1	0	2	1	0	1	1	0
s41	1	2	0	0	0	0	0	2	1	0	1	1	0
s42	1	2	0	0	0	0	0	2	1	0	1	1	0
s43	1	1	0	0	1	0	1	2	1	0	1	0	0
s44	1	2	0	0	0	0	0	2	1	0	1	1	0
s45	0	2	0	0	0	0	0	1	1	1	0	1	0
s46	1	2	0	0	1	1	1	2	1	0	0	0	0
s47	0	2	0	0	0	0	0	1	1	0	1	1	0
s48	1	2	0	0	0	0	0	2	1	1	1	1	0
s49	0	2	0	0	0	0	0	4	1	0	1	0	0
s50	1	1	0	0	0	0	0	2	1	1	1	1	0
s51	0	2	0	0	0	0	1	2	1	1	1	1	1
s52	1	2	0	0	0	1	1	5	1	0	1	0	0
s53	1	2	0	0	0	0	1	2	0	0	1	1	0
s54	1	2	0	0	0	0	0	2	1	0	1	1	0
s55	0	2	0	0	0	0	0	1	1	1	1	1	1
s56	1	2	0	0	0	1	1	2	1	1	0	0	0
s57	1	2	0	0	0	0	1	2	1	1	1	1	0
s58	0	2	1	1	0	1	0	1	0	0	0	1	0
s59	1	2	0	0	0	1	0	2	1	0	1	1	0
s60	1	2	0	0	0	0	0	1	1	0	1	1	1
s61	1	1	0	0	0	0	0	1	1	1	1	1	1
s62	1	2	0	0	0	0	1	2	1	0	1	1	0
s63	1	2	0	0	1	1	0	1	1	1	1	1	1
s64	0	2	1	0	0	0	0	2	1	0	0	0	0
s65	1	1	0	0	0	0	0	2	1	0	0	0	0
s66	1	2	0	0	0	0	0	2	1	1	1	1	1
s67	0	2	0	1	1	0	0	1	1	1	0	1	0
s68	0	2	0	0	1	0	0	2	1	0	1	1	0
s69	0	1	0	1	0	0	0	1	1	1	1	1	1
s70	1	1	0	0	1	0	0	2	1	0	1	1	1
s71	1	2	0	0	1	0	0	3	1	0	0	0	0
s72	1	1	0	0	1	1	0	2	1	0	1	0	0
s73	0	2	0	0	0	0	0	2	0	0	0	0	0
s74	0	2	0	0	0	0	0	1	1	0	1	0	0
s75	0	2	0	0	0	0	0	1	1	1	1	1	1
s76	0	2	0	0	0	0	0	1	1	1	0	1	0
s77	1	2	0	0	0	0	0	2	1	0	0	0	0
s78	1	2	0	0	0	0	0	1	1	0	1	1	0
s79	0	2	1	1	1	0	0	2	1	0	1	1	1
s80	0	1	0	1	0	0	0	1	1	0	0	0	0
s81	0	2	0	1	0	0	0	1	0	1	1	1	1
s82	1	1	0	0	1	0	0	2	1	0	0	1	0
s83	0	2	0	0	0	0	0	1	1	0	1	1	0
s84	1	2	0	0	1	0	0	2	1	0	1	1	1
s85	1	2	0	0	0	0	0	1	1	0	1	1	0
s86	1	2	0	0	1	0	0	1	1	0	1	1	0
s87	1	2	0	1	0	0	0	1	0	1	1	1	0
s88	0	2	0	1	0	0	0	1	1	1	1	1	0
s89	1	1	1	0	0	0	1	3	1	0	0	1	1
s90	0	2	0	0	0	0	0	1	1	0	0	0	0
s91	0	2	0	0	0	0	0	1	1	0	1	1	0
s92	0	1	0	0	1	0	0	2	1	0	1	0	0
s93	1	1	0	0	0	0	1	5	1	0	1	0	0
s94	1	2	0	0	0	1	0	2	1	0	1	1	0
s95	1	2	0	0	0	1	1	2	1	1	1	1	0
s96	1	2	0	0	0	1	0	1	0	1	0	1	0
s97	0	2	0	0	1	0	0	2	1	1	1	1	1
s98	1	2	0	0	0	1	0	2	1	1	1	1	0
s99	1	2	0	0	0	0	0	2	1	0	0	1	0
s100	0	1	0	0	0	0	0	1	1	1	0	1	1
s101	1	2	0	1	0	1	0	2	1	0	0	1	1
s102	1	2	0	0	0	0	1	2	1	0	1	0	0
s103	1	2	0	0	0	0	0	2	0	0	0	1	1
s104	1	1	0	0	1	0	0	1	0	1	1	1	0
s105	0	2	0	0	1	0	0	1	1	0	1	1	1
s106	1	2	0	0	0	0	0	2	1	1	1	1	0
s107	0	2	0	0	0	0	0	1	1	1	0	1	0
s108	0	2	0	0	0	0	0	1	1	1	1	1	0
s109	0	1	0	0	0	0	0	1	1	0	1	0	0
s110	1	2	0	0	0	0	0	2	1	1	1	1	0
s111	1	1	0	0	0	0	0	2	1	1	1	1	1
s112	1	1	0	0	0	0	0	1	1	0	1	0	0
s113	1	2	0	0	0	1	0	2	1	1	1	1	0
s114	0	2	0	0	0	0	0	2	1	0	1	0	0
s115	0	2	0	0	0	0	0	1	0	0	1	1	1
s116	1	2	0	0	0	1	0	2	1	0	1	1	1
s117	1	1	0	0	0	0	0	2	1	0	1	0	0
s118	0	1	0	1	0	0	0	1	0	0	0	1	0
s119	0	1	0	1	1	0	0	2	1	0	0	1	0
s120	1	2	0	0	1	0	0	2	1	0	0	1	0
s121	1	2	0	0	0	0	1	1	1	0	1	0	0
s122	1	1	1	0	1	0	0	2	1	0	1	0	0
s123	0	2	0	0	0	0	0	1	1	0	1	0	0
s124	1	2	0	0	1	0	0	1	1	1	1	1	0
s125	1	1	0	0	1	0	0	2	1	1	1	1	0
s126	0	1	0	0	0	0	0	1	1	0	0	1	1
s127	1	2	0	0	0	0	0	2	1	1	1	1	0
s128	0	2	0	0	1	0	0	1	1	1	1	1	0
s129	0	2	0	0	0	0	0	1	1	0	0	1	1
s130	1	2	0	0	0	0	0	1	1	0	1	0	0
s131	0	2	0	0	0	0	0	1	1	0	1	1	0
s132	1	1	0	0	1	0	0	2	1	0	1	0	0
s133	0	2	0	0	0	0	0	2	1	1	0	1	0
s134	1	2	0	0	0	0	1	2	1	0	1	1	0
s135	1	2	0	0	0	0	0	1	1	0	1	0	0
s136	1	1	0	0	0	1	0	1	1	0	1	0	0
s137	1	2	0	0	0	0	0	2	1	0	1	0	0
s138	1	2	0	0	0	0	0	2	1	1	1	1	0
s139	0	2	0	0	1	0	0	1	1	0	0	1	0
s140	1	2	0	0	0	0	0	2	1	0	1	1	0
s141	1	2	0	0	1	1	0	5	1	0	1	1	0
s142	1	2	0	0	1	1	1	1	1	0	1	0	0
s143	1	2	0	0	0	1	0	2	1	1	1	1	1
s144	1	1	1	0	0	0	0	1	1	0	1	1	1
s145	1	2	0	0	0	0	0	2	1	1	1	1	1
s146	1	1	0	1	1	0	0	2	1	1	1	1	0
s147	0	1	0	1	0	0	0	1	1	1	1	1	0
s148	0	1	0	1	0	0	0	2	1	0	1	1	0
s149	1	1	0	0	0	0	0	2	1	1	1	1	1
s150	1	1	0	1	1	1	0	2	1	1	1	1	1
s151	0	1	0	1	0	0	1	2	1	0	1	1	0
s152	1	2	0	1	0	1	0	1	1	0	1	1	0
s153	0	2	0	0	0	1	0	1	1	0	1	0	0
s154	1	1	0	0	0	0	0	1	1	0	1	0	0
s155	1	2	0	0	1	0	0	2	1	0	1	0	0
s156	1	2	0	0	0	1	0	1	1	0	1	1	0
s157	1	1	1	1	1	0	0	2	1	0	1	1	0
s158	0	1	0	0	1	0	0	2	1	1	0	1	0
s159	1	2	0	0	0	0	0	1	1	0	1	1	0
s160	0	1	0	0	0	0	0	1	1	0	0	1	0
s161	1	1	1	1	0	0	0	1	1	0	1	0	0
s162	1	2	0	0	0	0	0	1	1	0	1	1	0
s163	1	2	0	0	0	0	1	2	1	1	1	1	0

## Sheet: resistance code
subjects	FZD resistance=1; sensitive=0	TET resistance=1; sensitive=0	LEV resistance=1; sensitive=0	MTZ resistance=1; sensitive=0	CLR resistance=1; sensitive=0	AML resistance=1; sensitive=0	Quantity of drug resistance	History of H.pylori treatment, yes=1; no=0
s1	0	0	1	1	1	1	4	1
s2	0	0	0	1	0	0	1	1
s3	0	0	1	1	1	0	3	1
s4	0	0	1	1	1	0	3	1
s5	0	0	1	1	1	0	3	1
s6	0	0	0	1	0	0	1	1
s7	0	0	0	1	1	0	2	0
s8	0	0	0	1	1	0	2	1
s9	0	0	0	1	0	0	1	1
s10	0	0	1	1	0	0	2	0
s11	0	0	0	1	0	0	1	1
s12	0	0	0	1	1	1	3	1
s13	0	0	1	0	0	0	1	0
s14	0	0	1	1	1	1	4	1
s15	0	0	1	1	1	0	3	1
s16	0	0	0	1	0	0	1	1
s17	0	0	0	1	1	0	2	1
s18	0	0	1	1	1	1	4	1
s19	0	0	0	1	0	0	1	1
s20	0	0	0	1	1	1	3	1
s21	0	0	1	0	1	0	2	1
s22	0	0	1	1	1	0	3	1
s23	0	0	1	1	1	0	3	0
s24	0	0	0	1	0	0	1	0
s25	0	0	0	1	1	0	2	0
s26	0	0	1	0	1	0	2	1
s27	0	0	1	1	1	0	3	1
s28	0	0	0	1	1	0	2	1
s29	0	0	1	1	0	0	2	0
s30	0	0	1	1	1	0	3	1
s31	0	0	1	1	1	1	4	1
s32	0	0	1	1	1	0	3	1
s33	0	0	1	1	1	0	3	1
s34	0	0	1	1	1	0	3	1
s35	0	0	1	1	1	1	4	1
s36	0	0	0	1	0	0	1	1
s37	0	0	1	0	1	0	2	1
s38	0	0	1	1	1	1	4	1
s39	0	0	1	1	0	0	2	1
s40	0	0	0	1	1	0	2	1
s41	0	0	0	1	1	0	2	1
s42	0	0	0	1	1	0	2	1
s43	0	0	0	1	0	0	1	1
s44	0	0	0	1	1	0	2	1
s45	0	0	1	0	1	0	2	1
s46	0	0	0	0	0	0	0	1
s47	0	0	0	1	1	0	2	1
s48	0	0	1	1	1	0	3	1
s49	0	0	0	1	0	0	1	1
s50	0	0	1	1	1	0	3	1
s51	0	0	1	1	1	1	4	1
s52	0	0	0	1	0	0	1	1
s53	0	0	0	1	1	0	2	0
s54	0	0	0	1	1	0	2	1
s55	0	0	1	1	1	1	4	1
s56	0	0	1	0	0	0	1	1
s57	0	0	1	1	1	0	3	1
s58	0	0	0	0	1	0	1	0
s59	0	0	0	1	1	0	2	1
s60	0	0	0	1	1	1	3	1
s61	0	0	1	1	1	1	4	1
s62	0	0	0	1	1	0	2	1
s63	0	0	1	1	1	1	4	1
s64	0	0	0	0	0	0	0	1
s65	0	0	0	0	0	0	0	1
s66	0	0	1	1	1	1	4	1
s67	0	0	1	0	1	0	2	1
s68	0	0	0	1	1	0	2	1
s69	0	0	1	1	1	1	4	1
s70	0	0	0	1	1	1	3	1
s71	0	0	0	0	0	0	0	1
s72	0	0	0	1	0	0	1	1
s73	0	0	0	0	0	0	0	0
s74	0	0	0	1	0	0	1	1
s75	0	0	1	1	1	1	4	1
s76	0	0	1	0	1	0	2	1
s77	0	0	0	0	0	0	0	1
s78	0	0	0	1	1	0	2	1
s79	0	0	0	1	1	1	3	1
s80	0	0	0	0	0	0	0	1
s81	0	0	1	1	1	1	4	0
s82	0	0	0	0	1	0	1	1
s83	0	0	0	1	1	0	2	1
s84	0	0	0	1	1	1	3	1
s85	0	0	0	1	1	0	2	1
s86	0	0	0	1	1	0	2	1
s87	0	0	1	1	1	0	3	0
s88	0	0	1	1	1	0	3	1
s89	0	0	0	0	1	1	2	1
s90	0	0	0	0	0	0	0	1
s91	0	0	0	1	1	0	2	1
s92	0	0	0	1	0	0	1	1
s93	0	0	0	1	0	0	1	1
s94	0	0	0	1	1	0	2	1
s95	0	0	1	1	1	0	3	1
s96	0	0	1	0	1	0	2	0
s97	0	0	1	1	1	1	4	1
s98	0	0	1	1	1	0	3	1
s99	0	0	0	0	1	0	1	1
s100	0	0	1	0	1	1	3	1
s101	0	0	0	0	1	1	2	1
s102	0	0	0	1	0	0	1	1
s103	0	0	0	0	1	1	2	0
s104	0	0	1	1	1	0	3	0
s105	0	0	0	1	1	1	3	1
s106	0	0	1	1	1	0	3	1
s107	0	0	1	0	1	0	2	1
s108	0	0	1	1	1	0	3	1
s109	0	0	0	1	0	0	1	1
s110	0	0	1	1	1	0	3	1
s111	0	0	1	1	1	1	4	1
s112	0	0	0	1	0	0	1	1
s113	0	0	1	1	1	0	3	1
s114	0	0	0	1	0	0	1	1
s115	0	0	0	1	1	1	3	0
s116	0	0	0	1	1	1	3	1
s117	0	0	0	1	0	0	1	1
s118	0	0	0	0	1	0	1	0
s119	0	0	0	0	1	0	1	1
s120	0	0	0	0	1	0	1	1
s121	0	0	0	1	0	0	1	1
s122	0	0	0	1	0	0	1	1
s123	0	0	0	1	0	0	1	1
s124	0	0	1	1	1	0	3	1
s125	0	0	1	1	1	0	3	1
s126	0	0	0	0	1	1	2	1
s127	0	0	1	1	1	0	3	1
s128	0	0	1	1	1	0	3	1
s129	0	0	0	0	1	1	2	1
s130	0	0	0	1	0	0	1	1
s131	0	0	0	1	1	0	2	1
s132	0	0	0	1	0	0	1	1
s133	0	0	1	0	1	0	2	1
s134	0	0	0	1	1	0	2	1
s135	0	0	0	1	0	0	1	1
s136	0	0	0	1	0	0	1	1
s137	0	0	0	1	0	0	1	1
s138	0	0	1	1	1	0	3	1
s139	0	0	0	0	1	0	1	1
s140	0	0	0	1	1	0	2	1
s141	0	0	0	1	1	0	2	1
s142	0	0	0	1	0	0	1	1
s143	0	0	1	1	1	1	4	1
s144	0	0	0	1	1	1	3	1
s145	0	0	1	1	1	1	4	1
s146	0	0	1	1	1	0	3	1
s147	0	0	1	1	1	0	3	1
s148	0	0	0	1	1	0	2	1
s149	0	0	1	1	1	1	4	1
s150	0	0	1	1	1	1	4	1
s151	0	0	0	1	1	0	2	1
s152	0	0	0	1	1	0	2	1
s153	0	0	0	1	0	0	1	1
s154	0	0	0	1	0	0	1	1
s155	0	0	0	1	0	0	1	1
s156	0	0	0	1	1	0	2	1
s157	0	0	0	1	1	0	2	1
s158	0	0	1	0	1	0	2	1
s159	0	0	0	1	1	0	2	1
s160	0	0	0	0	1	0	1	1
s161	0	0	0	1	0	0	1	1
s162	0	0	0	1	1	0	2	1
s163	0	0	1	1	1	0	3	1
